# Supplementary material
Source: publisher figshare collection journal article supplement (https://acs.figshare.com/ndownloader/files/15036026)
Supplement: Supplementary file 1 [file 15036026]

## Supporting Information

### Pharmacological Chaperones for the Treatment of $\alpha$ -Mannosidosis

Rocío Rísquez-Cuadro,<sup>†,‡</sup> Reimi Matsumoto,<sup>‡,‡</sup> Fernando Ortega Caballero,<sup>†</sup> Eiji Nanba,<sup>‡</sup>

Katsumi Higaki,<sup>\*,‡</sup> José Manuel García Fernández,<sup>\*,§</sup> Carmen Ortiz Mellet<sup>\*,†</sup>

<sup>†</sup>Department of Organic Chemistry, Faculty of Chemistry, University of Sevilla, C/ Profesor  
García González 1, 41012 Sevilla, Spain.

<sup>‡</sup>Organization for Research Initiative and Promotion, Tottori University, 86 Nishi-cho, Yonago  
683-8503, Japan

<sup>§</sup>Instituto de Investigaciones Químicas (IIQ), CSIC - Universidad de Sevilla, Avda. Américo  
Vespucio 49, Isla de la Cartuja, 41092 Sevilla, Spain

### Content list

|                                                                                                                                |                  |
|--------------------------------------------------------------------------------------------------------------------------------|------------------|
| .- Copies of the <sup>1</sup> H and <sup>13</sup> C NMR spectra of the new compounds                                           | Figures S1 to S5 |
| .- Inhibition constants values for <b>1-10</b> against commercial glycosidases                                                 | Table 1          |
| .- Lineweaver-Burk / Dixon plots for inhibition of Jack bean<br>$\alpha$ -mannosidase                                          | Figures          |
|                                                                                                                                | Pages S6 to S10  |
| .- Procedure to Monitor the Stability of the Heteromultivalent PCs <b>8</b><br>and <b>9</b> towards GH38 $\alpha$ -Mannosidase | Pages S9-S10     |

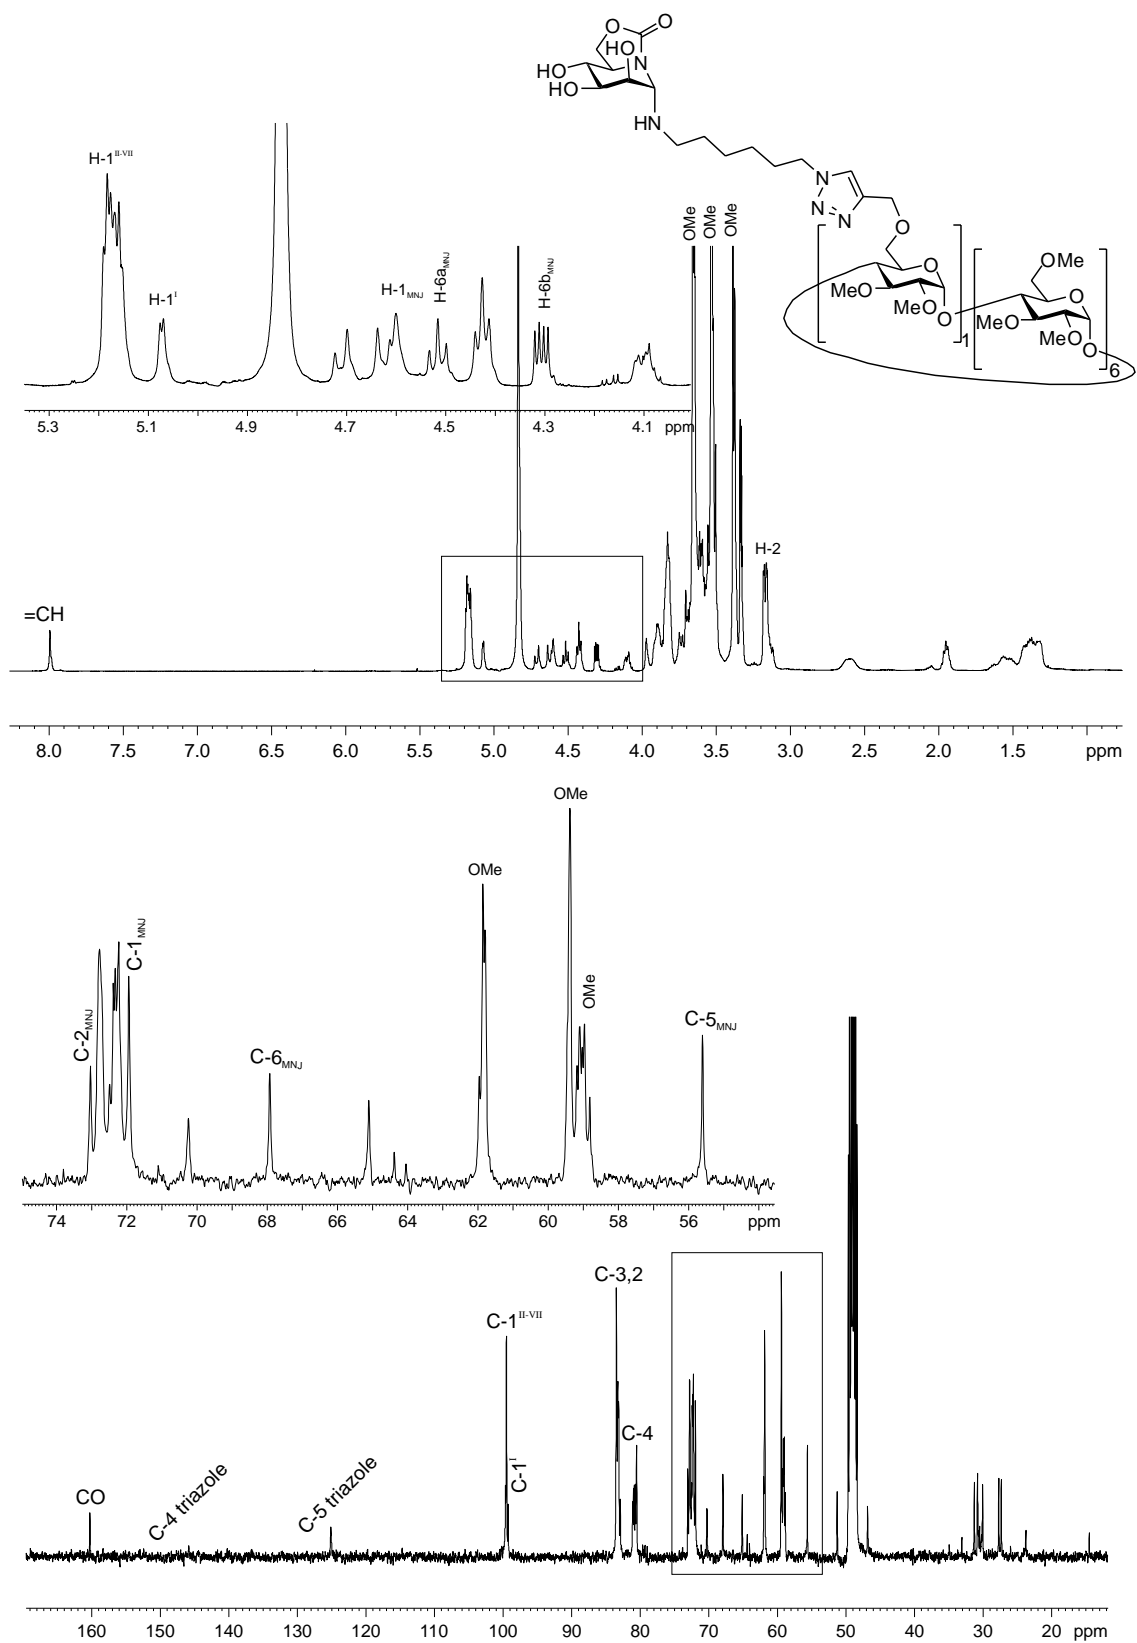

**Figure S1.**  $^1\text{H}$  and  $^{13}\text{C}$  NMR (500 and 125.7 MHz,  $\text{CD}_3\text{OD}$ ) of **6**.

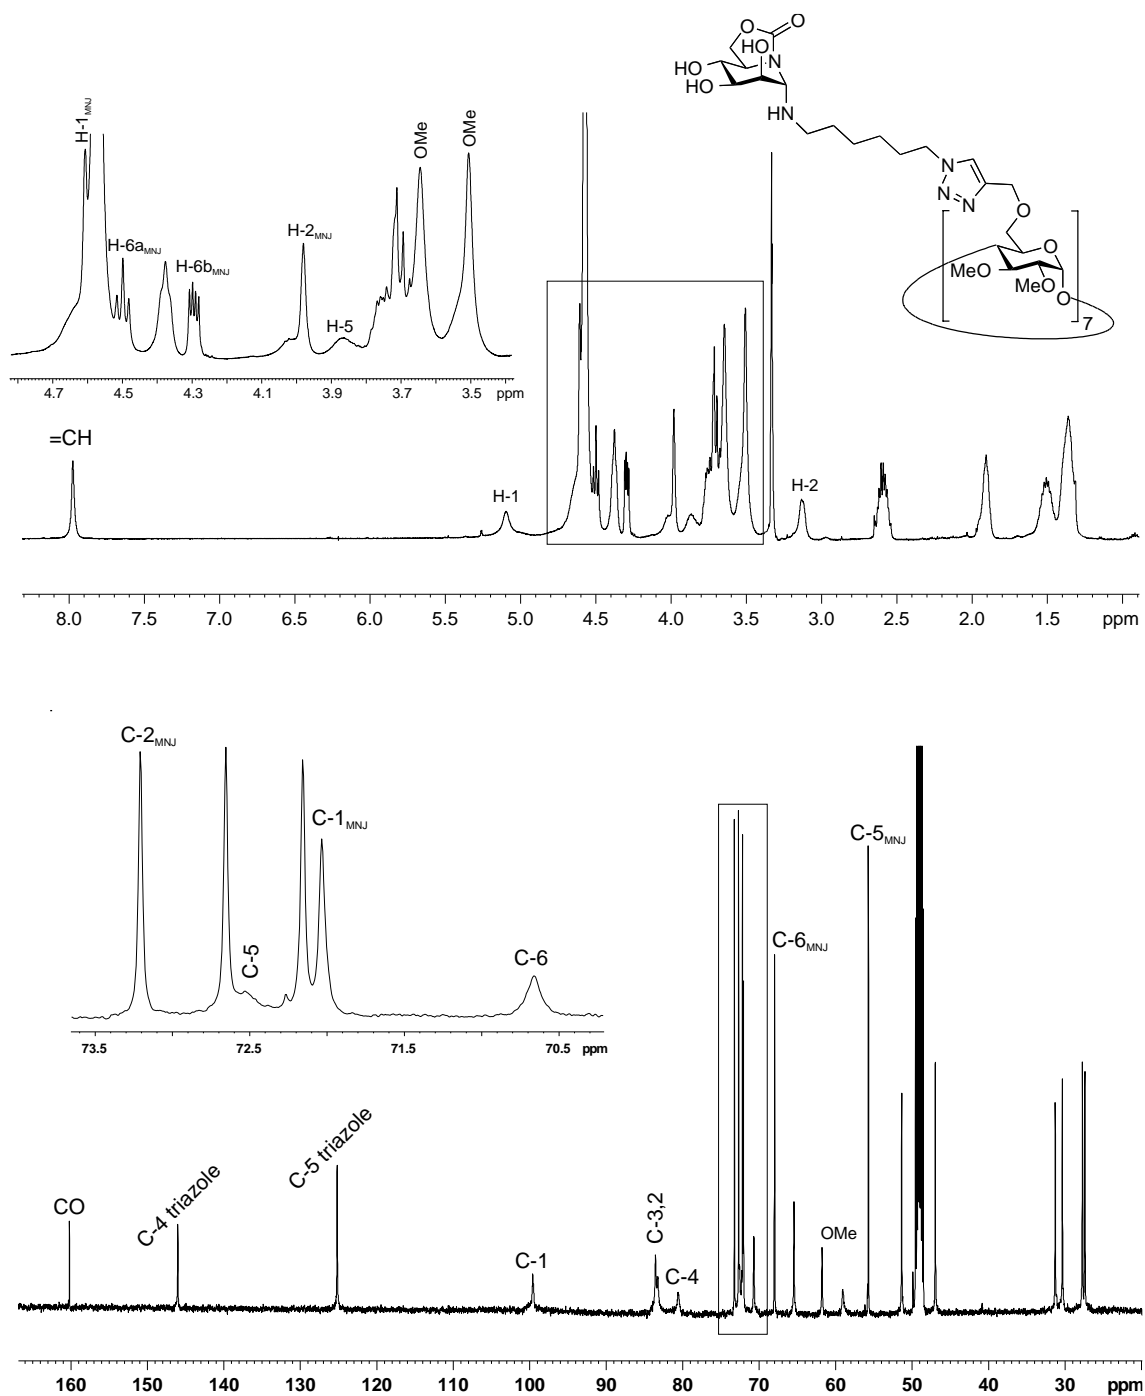

**Figure S2.**  $^1\text{H}$  and  $^{13}\text{C}$  NMR (500 and 125.7 MHz,  $\text{CD}_3\text{OD}$ , 323 K) of **7**.

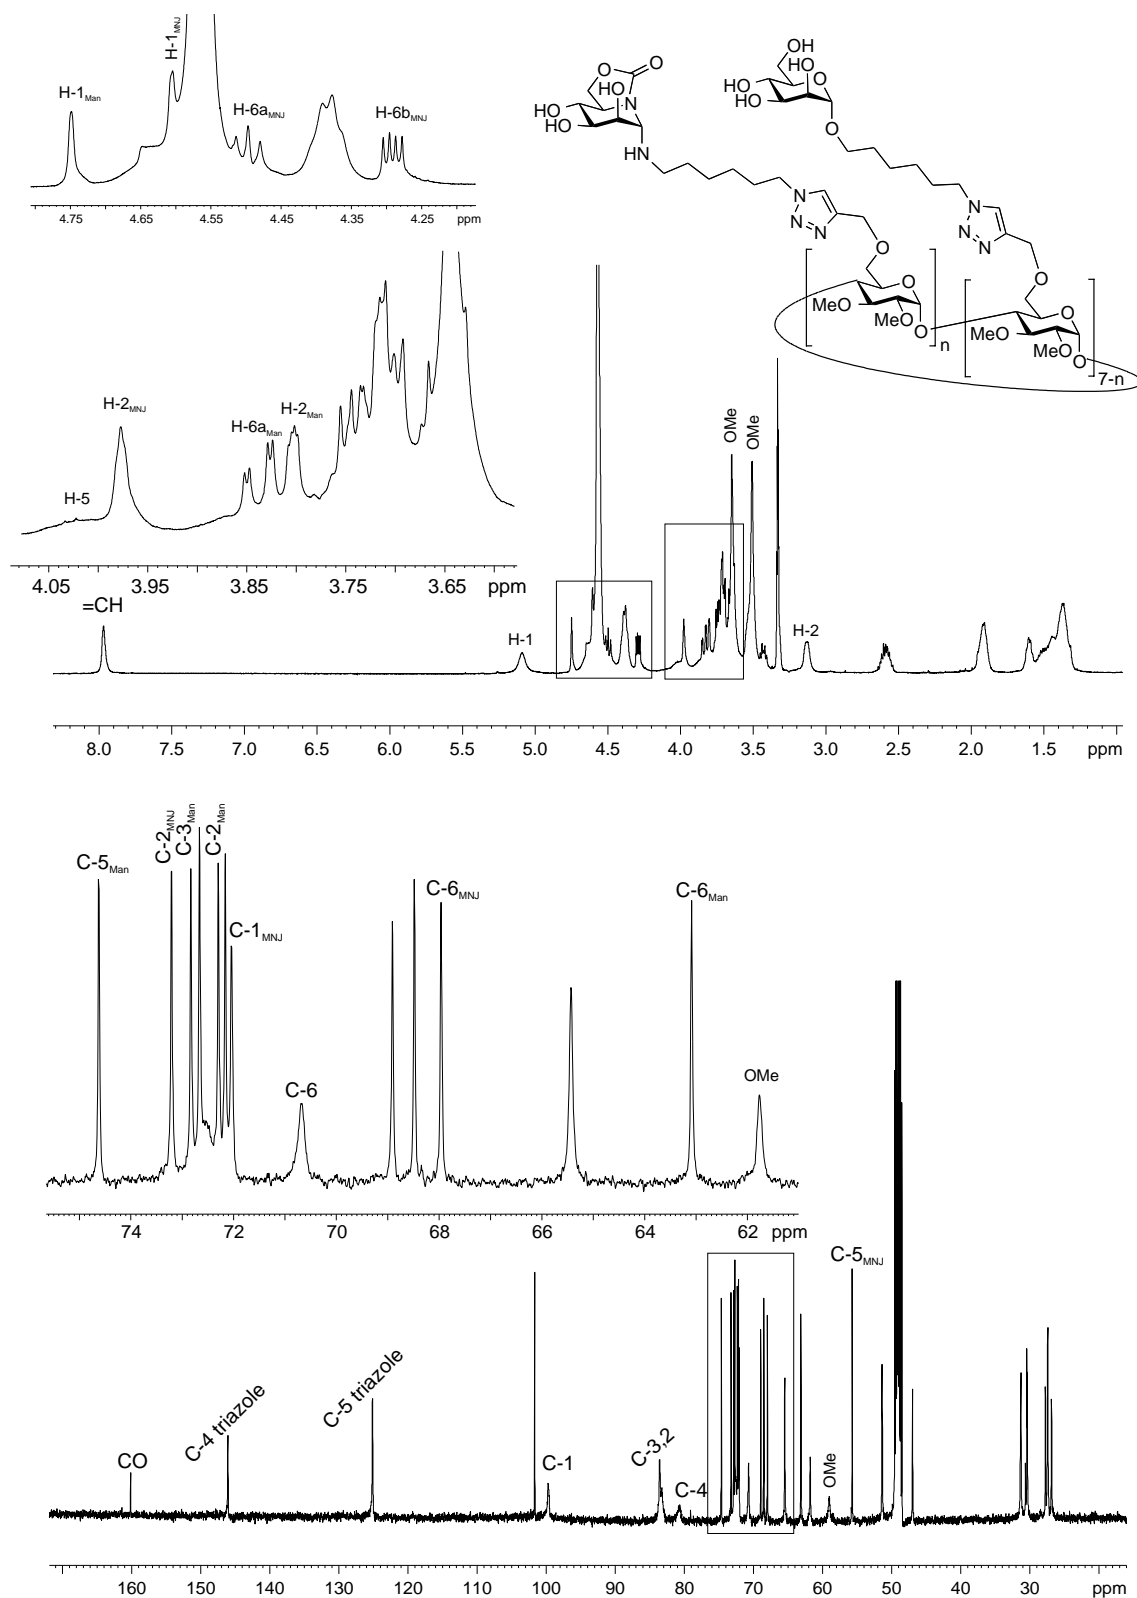

**Figure S3.** <sup>1</sup>H and <sup>13</sup>C NMR (500 and 125.7 MHz, CD<sub>3</sub>OD, 323 K and 313 K, respectively) of **8**.

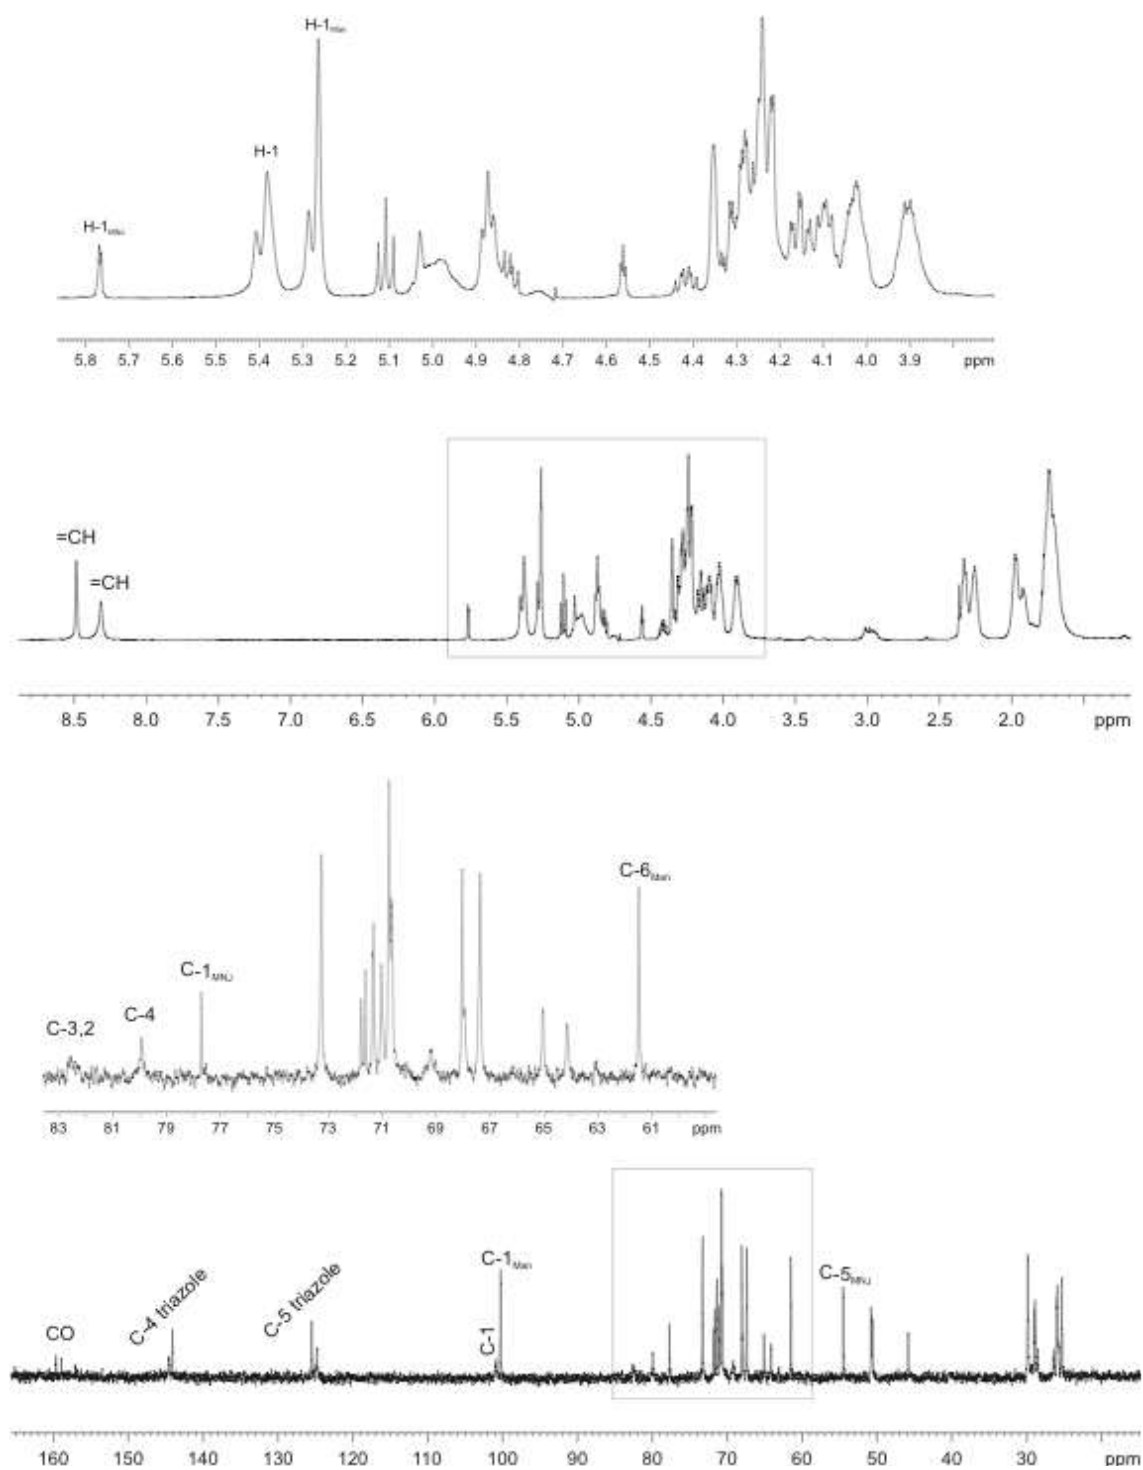

**Figure S4.**  $^1\text{H}$  and  $^{13}\text{C}$  NMR (500 and 100.6 MHz,  $\text{D}_2\text{O}$ , 343 K and 333 K, respectively) of **9**.

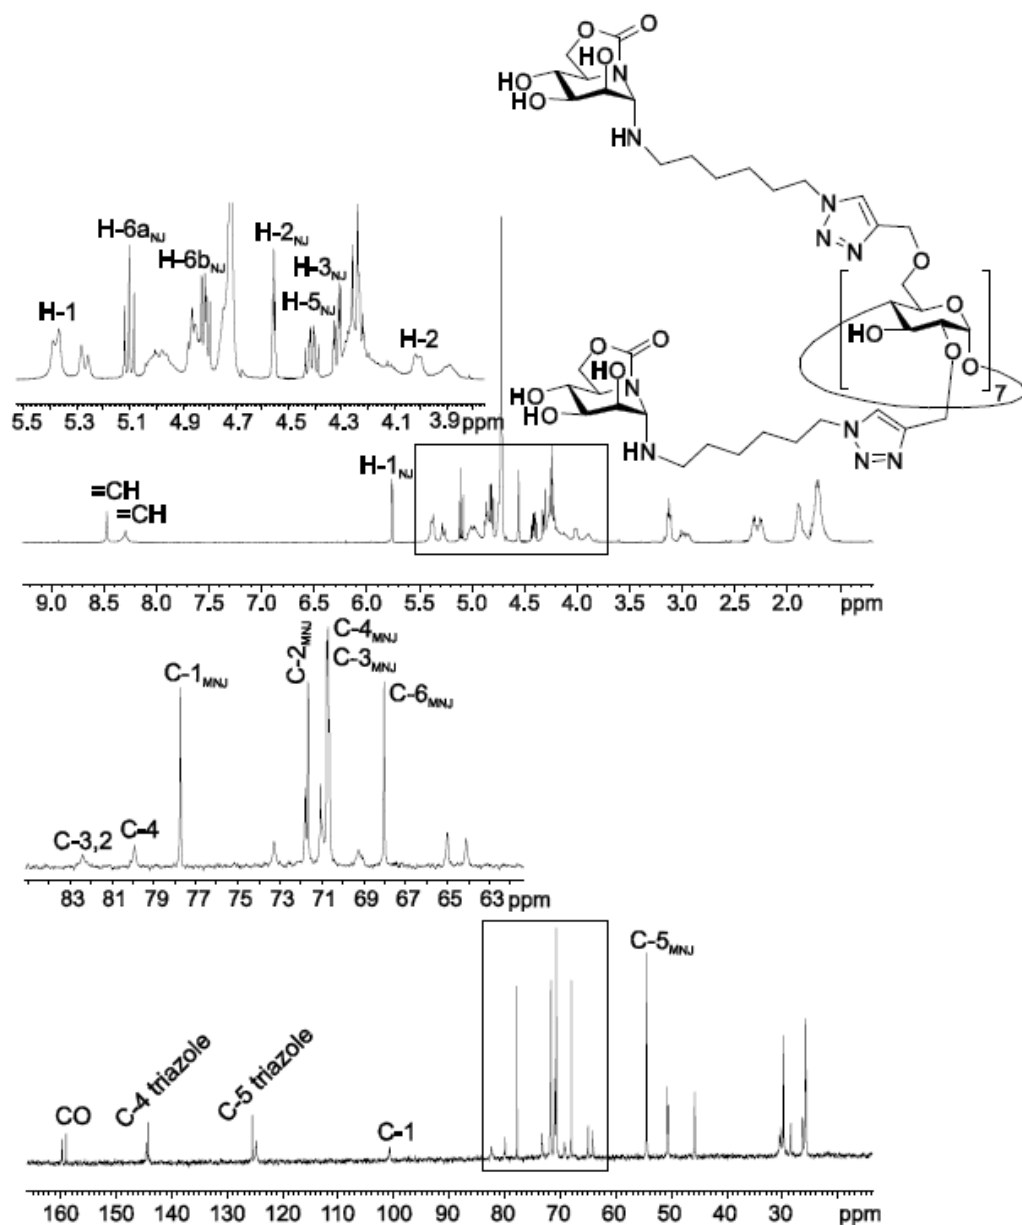

**Figure S5.**  $^1\text{H}$  and  $^{13}\text{C}$  NMR (500 and 100.6 MHz,  $\text{D}_2\text{O}$ , 343 K and 333 K, respectively) of **10**.

**Table 1.** Inhibition constants values ( $K_i$ ,  $\mu\text{M}$ ) for the OMJ derivatives **1-10** against commercial glycosidases.

| Compound  | Enzyme                                 |                                       |
|-----------|----------------------------------------|---------------------------------------|
|           | $\beta$ -glucosidase<br>(bovine liver) | $\alpha$ -mannosidase<br>(Jack beans) |
| <b>1</b>  | 260 $\pm$ 26                           | 3.2 $\pm$ 0.4                         |
| <b>5</b>  | 728 $\pm$ 67                           | 4.5 $\pm$ 0.5                         |
| <b>6</b>  | 378 $\pm$ 30                           | 47 $\pm$ 5                            |
| <b>7</b>  | 149 $\pm$ 15                           | 0.51 $\pm$ 0.05                       |
| <b>8</b>  | 145 $\pm$ 14                           | 3.1 $\pm$ 0.3                         |
| <b>9</b>  | n.i.                                   | 2.3 $\pm$ 0.2                         |
| <b>10</b> | 147 $\pm$ 15                           | 0.026 $\pm$ 0.003                     |

<sup>a</sup>Inhibition was competitive in all cases; no inhibition was observed for any of the compounds at 2 mM on yeast  $\alpha$ -glucosidase (except **10**,  $K_i$  59 $\pm$ 6  $\mu\text{M}$ ), yeast Isomaltase (except **10**,  $K_i$  239 $\pm$ 24  $\mu\text{M}$ ), *Aspergillus niger* amyloglucosidase, green coffee  $\alpha$ -galactosidase, *E. coli*  $\beta$ -galactosidase, or *Helix pomatia*  $\beta$ -mannosidase (except **10**,  $K_i$  9 $\pm$ 0.4  $\mu\text{M}$ ). <sup>b</sup>n.i.: no inhibition observed at 2 mM.

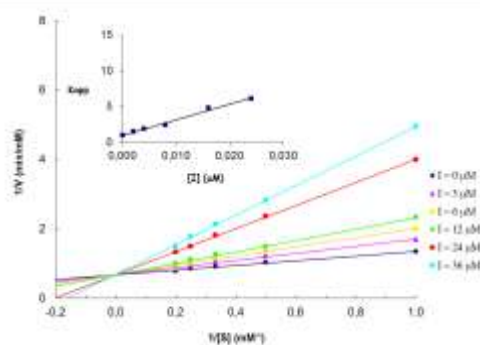

**Figure S6.** Lineweaver-Burk Plot for  $K_i$  determination (4.5  $\mu\text{M}$ ) of **5** against Jack bean  $\alpha$ -mannosidase.

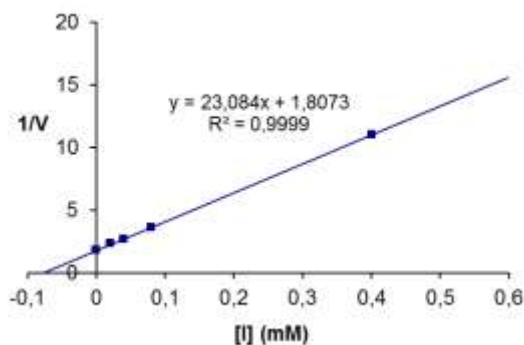

**Figure S7.** Dixon Plot for  $K_i$  determination (47  $\mu\text{M}$ ) of **6** against Jack bean  $\alpha$ -mannosidase.

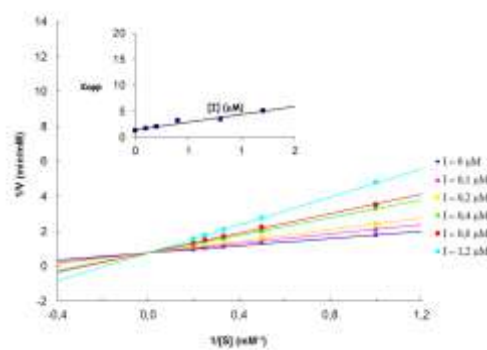

**Figure S8.** Lineweaver-Burk Plot for  $K_i$  determination ( $0.51 \mu\text{M}$ ) of **7** against Jack bean  $\alpha$ -mannosidase

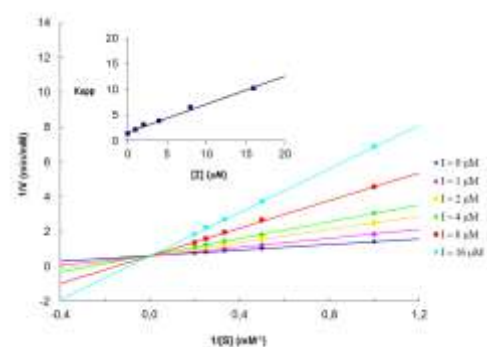

**Figure S9.** Lineweaver-Burk Plot for  $K_i$  determination ( $3.1 \mu\text{M}$ ) of **8** against Jack bean  $\alpha$ -mannosidase.

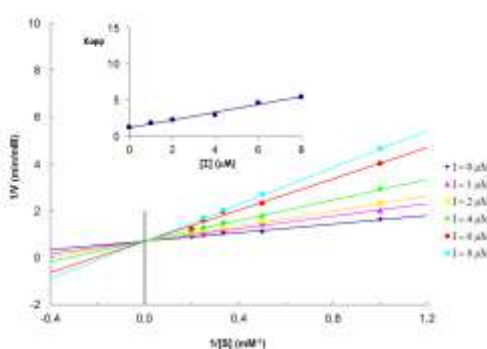

**Figure S10.** Lineweaver-Burk Plot for  $K_i$  determination ( $2.3 \mu\text{M}$ ) of **9** against Jack bean  $\alpha$ -mannosidase.

**Procedure to Monitor the Stability of the Heteromultivalent PCs 8 and 9 towards GH38  $\alpha$ -Mannosidase.** The susceptibility of towards  $\alpha$ -mannosidase hydrolysis of **8** and **9** was examined by incubating each conjugate with the enzyme at 37 °C under identical conditions to those used for determination of the inhibition constants during 4 h and monitoring the formation of free mannose by gas chromatography-flash ionization detection (GC-FID). For GC analysis, the samples were subjected to an oximation-trimethylsilylation protocol. Briefly, immediately after quenching, the samples were freeze-dried. To 15-20 mg of each sample, deionized water (1 mL) was added. To 100  $\mu$ L of the resulting solution, 100  $\mu$ L of internal standard (I.S.; 4 mg mL<sup>-1</sup> phenyl  $\beta$ -D-glucopyranoside in acetone-water 1:9, v/v) was then added and the final solution was evaporated to dryness at 60 °C (drying oven). The residue was treated with 1 mL of a solution of hydroxylamine in pyridine (20 mg mL<sup>-1</sup>) at 60 °C over 50 min. with mixing at intervals. Hexamethyldisilazane (200  $\mu$ L) and trimethylchlorosilane (100  $\mu$ L) were then added, and the reaction mixtures were kept at 60 °C over a further 40 min period. Formation of a white precipitate was observed during this operation, which was separated by centrifugation (13.000 rpm, 5 min) before injection in the GC apparatus. It is worth noting that following oximation-trimethylsilylation derivatization, reducing monosaccharides provides two peaks in the GC chromatograms, corresponding to the syn- and anti-TMS-oximes, whereas the I.S. provides a single peak.

**GC-FID Analysis.** GC-FID was carried out using an Agilent 7820A chromatograph with an EPC injector fitted with a cross-linked 5% phenyl-dimethylsiloxane column (HP-5; 30 m x 320  $\mu$ m x 0.25  $\mu$ m). Operating conditions were: injection port temperature 310 °C; splitting ratio 25:1; injection volume 1  $\mu$ L of derivatized samples; column oven temperature programmed from 180 to 310 °C at 5 °C min<sup>-1</sup>, with a 25 min hold at 310 °C; carrier gas helium (constant flow at 1.2 mL min<sup>-1</sup>); detector port temperature 310 °C. Total acquisition time was 45 min. The identity of D-mannose (elution time 4.8/5.1 min) was confirmed by comparison with the GC chromatograms of authentic samples. A calibration curve for quantitative determination was built by using a range of concentrations, from which the response factor relative to the I.S. (elution time 8.1 min) was determined.

No formation of free monosaccharides was observed in the above experiments for any of the heterovalent conjugates **8** or **9** against  $\alpha$ -mannosidase, meaning that they are resistant to

enzymatic hydrolysis. In contrast, control experiments showed that methyl  $\alpha$ -D-mannopyranoside and high mannos oligosaccharide (Man<sub>5</sub> and Man<sub>9</sub>) were hydrolyzed by  $\alpha$ -mannosidase under these conditions.
